# Supplementary material for: Cu2O–reduced graphene oxide composite as a high-performance electrocatalyst for oxygen evolution reaction in alkaline media
Source: Royal Society of Chemistry journal article supplement (doi:10.1039/d1nj03286k), 2021-01-01
Supplement: d1nj03286k1.pdf [file d1nj03286k1.pdf]

## Supporting Information

### **Cu<sub>2</sub>O-reduced Graphene Oxide Composites as High-Performance Electrocatalysts for Oxygen Evolution Reaction in Alkaline Media**

Xiaomei Xu,<sup>a</sup> Qingqing An,<sup>a</sup> Hao Sun,<sup>a</sup> Yongchun Wang,<sup>a</sup> Wenhui Shang,<sup>a</sup> Lixia

Bao,<sup>b</sup> Zhiyu Jia,<sup>\*a</sup> and Qiang Zhang<sup>\*a</sup>

<sup>a</sup>MOE Key Laboratory of Cluster Science, School of Chemistry and Chemical  
Engineering, Beijing Institute of Technology, Beijing 100081, China

E-Mail: [jzy@bit.edu.cn](mailto:jzy@bit.edu.cn), [zhangqiang6299@bit.edu.cn](mailto:zhangqiang6299@bit.edu.cn)

<sup>b</sup>Analysis & Testing Centre, Beijing Institute of Technology, Beijing 100081, China

## **Chemical reagents**

Carbon cloth was purchased from Shanghai Hesen Electric Co, Ltd. Sodium hydroxide (NaOH,  $\geq 96.0\%$ ), Copper(II)chloride dihydrate ( $\text{CuCl}_2 \cdot \text{H}_2\text{O}$ ,  $\geq 99.0\%$ ), Potassium hydroxide (KOH,  $\geq 85.0\%$ ) and Ammonia solution ( $\text{NH}_3 \cdot \text{H}_2\text{O}$ , 25.0-28.0%) were purchased from Beijing Tongguang Fine Chemical Company. Ethylene glycol ( $\text{C}_2\text{H}_6\text{O}_2$ ,  $\geq 99\%$ ) and hydroxylamine hydrochloride ( $\text{HONH}_2\text{HCl}$ ,  $\geq 98.5\%$ ) were purchased from Energy Chemical. Graphene oxide dispersion (Solid content) was purchased from The Sixth Element (Changzhou) Materials Technology co, ltd.

## **Electrochemical tests**

Electrochemical tests were performed in the three-electrode system. Among them, a carbon cloth with area of  $0.5 \times 0.5 \text{ cm}^2$  sandwiched by platinum sheets was used as the working electrode, the saturated calomel electrode was the reference electrode, and the glassy carbon electrode was the counter electrode. All electrochemical tests were performed on the electrochemical workstation model CHI760. During the LSV test, the scanning range was 0-1 mV vs RHE, and the scanning speed was  $5 \text{ mV s}^{-1}$ .

## **Electrochemical Measurements**

Electrochemical impedance spectroscopy (EIS) measurements were conducted at an overpotential in the frequency range of 0.05 to  $10^5$  Hz. EIS data were analysed using a Z-view software. The electrochemical surface areas (ECSA) was determined from the double-layer capacitance ( $C_{dl}$ ) values via LSV with different scan rates in the 0-1 V potential range without any redox processes. The ECSA can be calculated according to following equation:

$$\text{ECSA} = C_{\text{dl}}/C_s \quad (1)$$

where  $C_{\text{dl}}$  can be estimated as half of the slope, and  $C_s$  is normally between 0.02-0.06 mF cm<sup>-2</sup>.

In addition, the long-term stability of overall water splitting was measured by recording the current-time (I-t) curves at 1.51 V vs. RHE Ar-saturated 1.0 M KOH for 24 h.

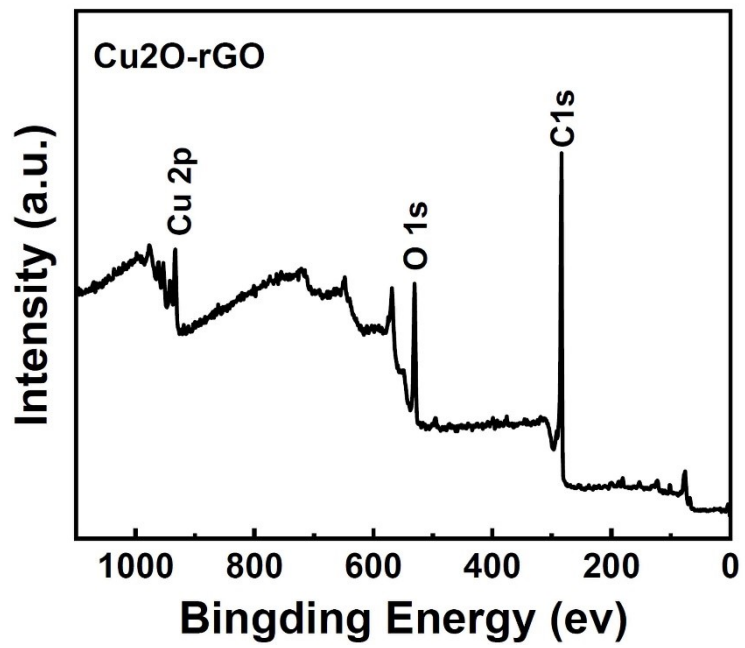

Fig. S1. XPS survey spectrum of Cu<sub>2</sub>O-rGO.

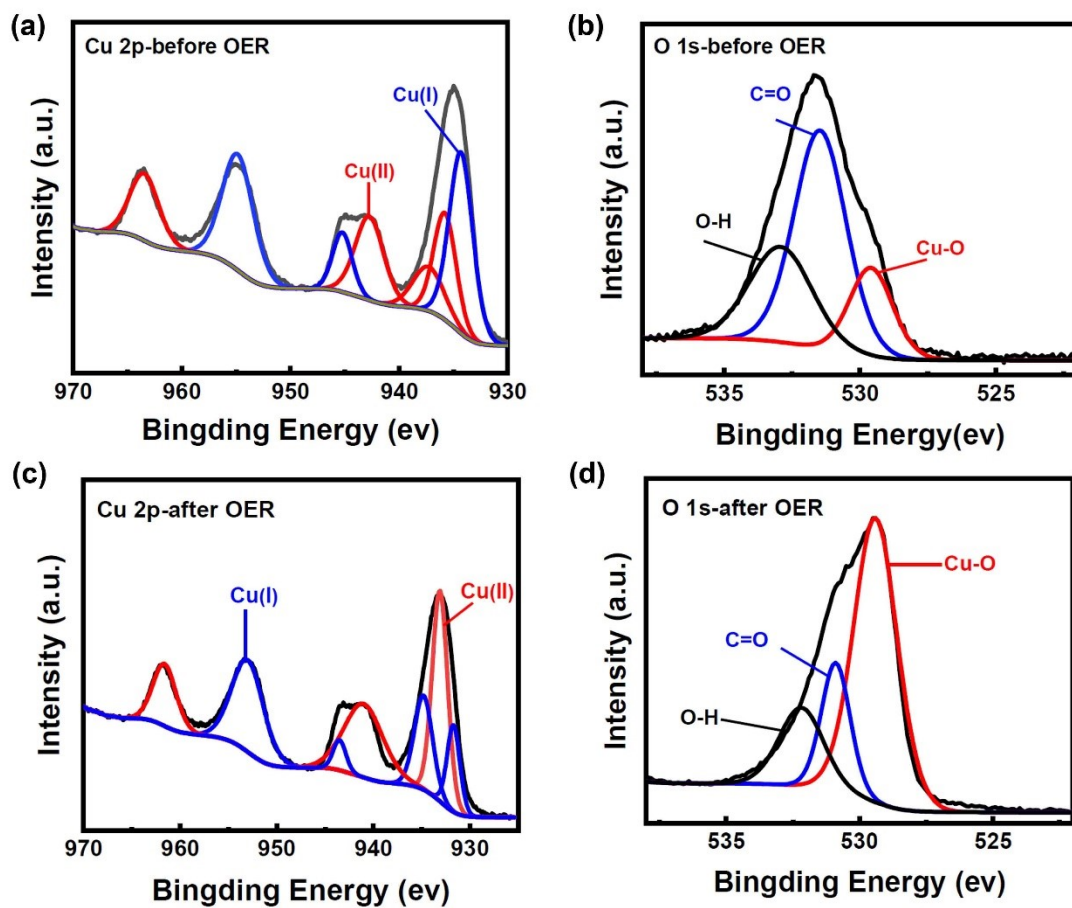

**Fig. S2.** XPS spectra of (a) Cu 2p and (b) O 1s before OER; XPS spectra of (c) Cu 2p and (d) O 1s after OER.

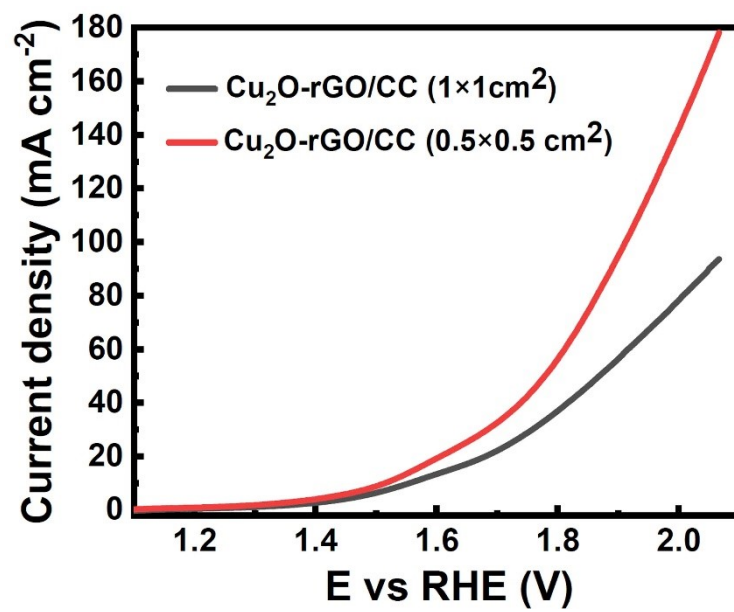

Fig. S3. LSV polarization curves of Cu<sub>2</sub>O-rGO/CC at different working area.

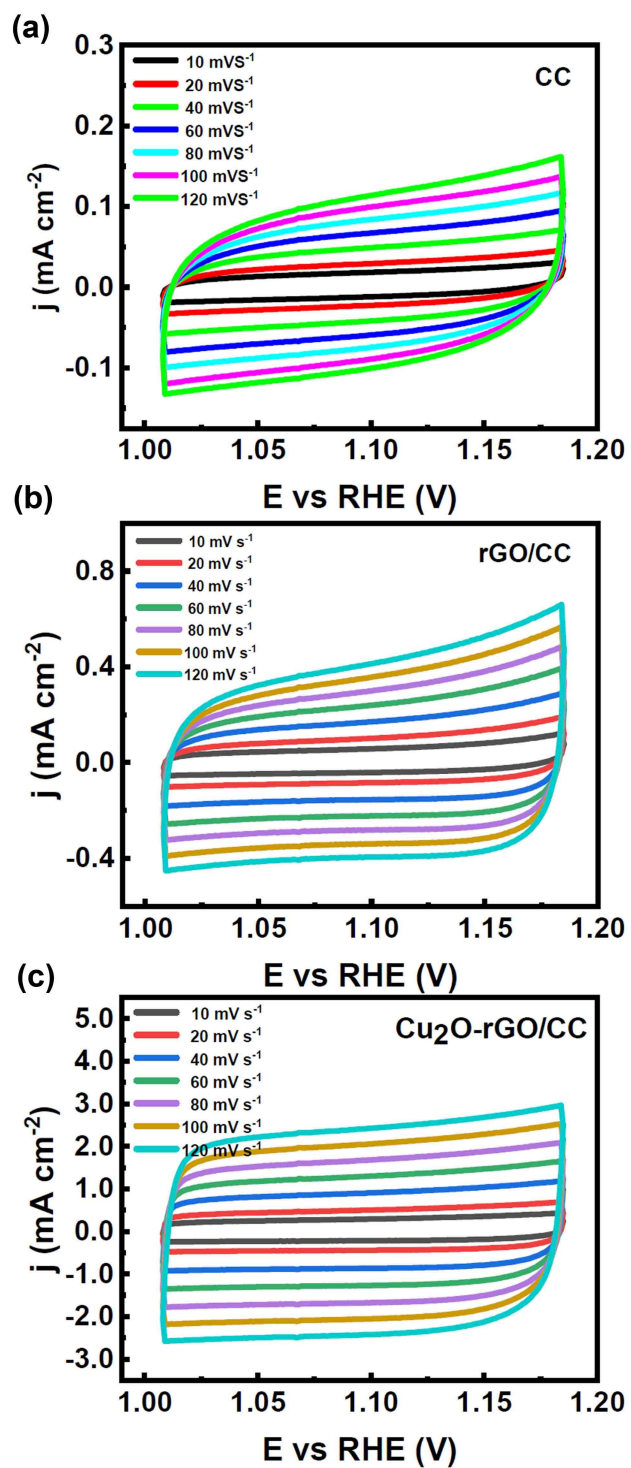

**Fig. S4.** CV curves of (a) CC, (b) rGO/CC and (c)  $\text{Cu}_2\text{O-rGO/CC}$  in the potential range of 1.01-1.19 V vs RHE at various scan rates (10-120  $\text{mV s}^{-1}$ ).

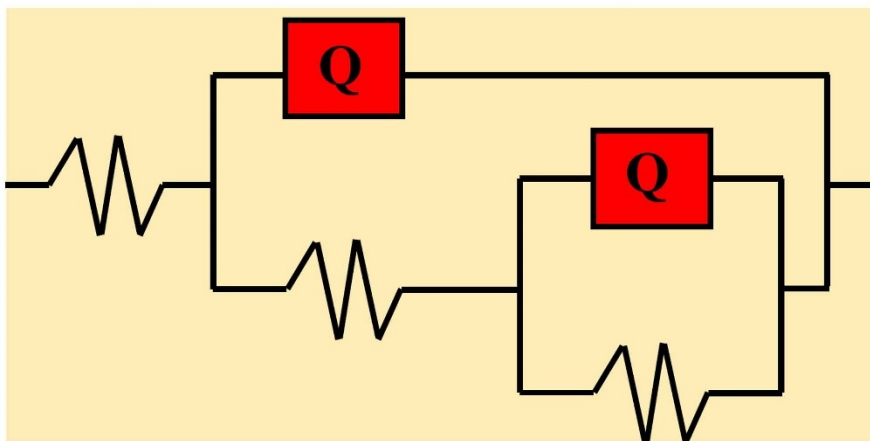

**Fig. S5.** The circuit equivalent model used for the data fitting for EIS Nyquist plots.

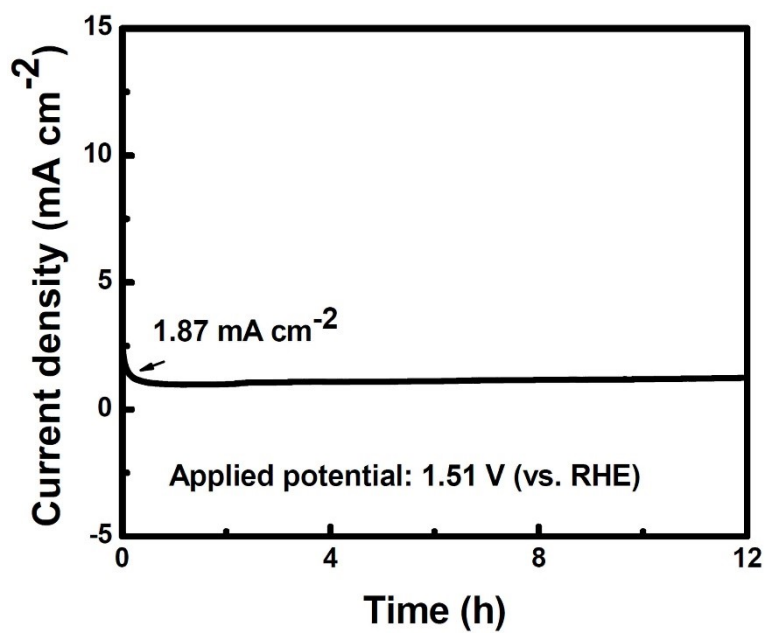

**Fig. S6.** The stability test results of Cu<sub>2</sub>O /CC at 1.51 V (vs. RHE)



**Table S1.** Fitting parameters obtained from the EIS data for the OER in 1 M KOH.

|                     | CC    | rGO/CC | Cu <sub>2</sub> O-rGO/CC |
|---------------------|-------|--------|--------------------------|
| R <sub>ct</sub> (Ω) | 5.364 | 4.28   | 5.064                    |
| R <sub>s</sub> (Ω)  | 165   | 43.37  | 8.93                     |

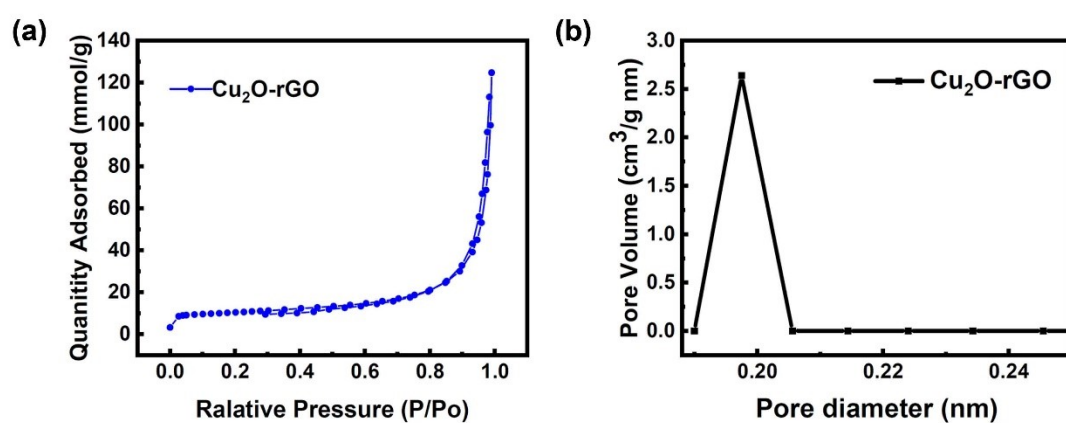

**Fig. S7.** (a) N<sub>2</sub> adsorption/desorption isotherms and (b) corresponding pore-size distribution of Cu<sub>2</sub>O-rGO.

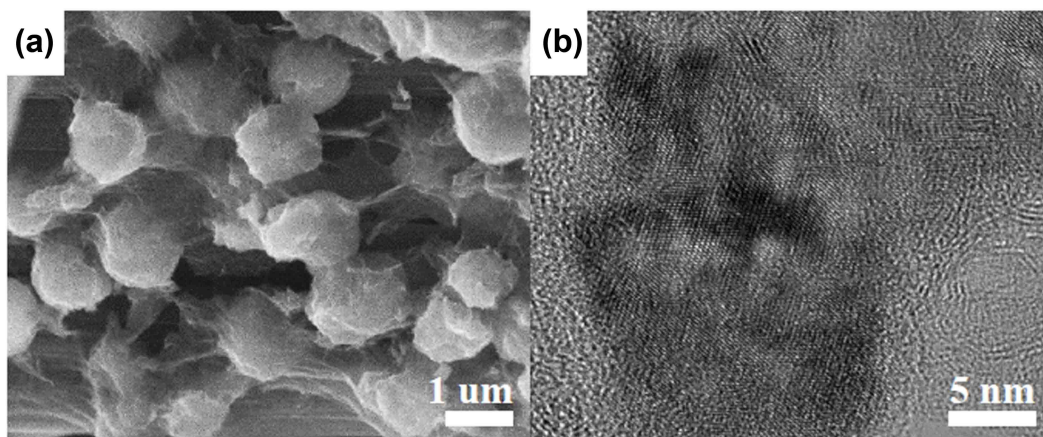

**Fig. S8.** SEM (a) and TEM (b) of  $\text{Cu}_2\text{O}$ -rGO after OER.

**Table S2.** Literature survey on potential and Tafel slope of the Cu-based nanostructures for OER.

| Electrocatalysts          | Electrolyte | $j$<br>[mA<br>$cm^{-2}$ ] | potential<br>(V vs<br>RHE) | Tafel slop<br>(mV dec <sup>-1</sup> ) | References       |
|---------------------------|-------------|---------------------------|----------------------------|---------------------------------------|------------------|
| Cu <sub>2</sub> O-rGO/CC  | 1.0 M KOH   | 10                        | 1.51                       | 178.1                                 | <i>this work</i> |
|                           |             | 50                        | 1.70                       |                                       |                  |
|                           |             | 100                       | 1.76                       |                                       |                  |
| RuO <sub>2</sub>          | 1.0 M KOH   | 10                        | 1.54                       | 82.6                                  | <i>this work</i> |
| Cu <sub>2</sub> O         | 1.0 M KOH   | 10                        | 1.75                       | -                                     | 1                |
| Cu <sub>2</sub> O-Cu foam | 1.0 M KOH   | 10                        | 1.57                       | 70.2                                  | 2                |
| CuCoO <sub>x</sub> -FeOOH | 1.0 M KOH   | 10                        | 1.52                       | 93.97                                 | 3                |
| CuO <sub>x</sub> -C       | 1.0 M KOH   | 10                        | 1.56                       | 181                                   | 4                |
| Cu <sub>2</sub> O@C       | 1.0 M KOH   | 10                        | 1.56                       | 63                                    | 5                |
| Cu <sub>2</sub> O/NWAS    | 1.0 M KOH   | 10                        | 1.55                       | -                                     | 6                |
| Cu <sub>2</sub> O         | 1.0 M KOH   | 10                        | 1.76                       | 128                                   | 7                |
| IrO <sub>2</sub>          | 1.0 M KOH   | 10                        | 1.51                       | 69                                    | 8                |
| RuO <sub>2</sub>          | 1.0 M KOH   | 10                        | 1.51                       | 81                                    | 9                |

## References:

- [1] Y. T. Lee, R. P. Gautam, S. M. Islam, C. J. Barile, Cuprous Oxide Electrodeposited with Nickel for the Oxygen Evolution Reaction in 1 M NaOH, *J. Phys. Chem. C*, 2018, **123**, 1287-1292.
- [2] H. Xu, J. X. Feng, Y. X. Tong, and G. R. Li, Cu<sub>2</sub>O-Cu Hybrid Foams as High-Performance Electrocatalysts for Oxygen Evolution Reaction in Alkaline Media, *ACS Catal.*, 2016, **7**, 986-991.
- [3] M. Li, Y. P. Xiong, X. T. Liu, X. J. Bo, Y. F. Zhang, C. Hana and L. P. Guo, Facile synthesis of electrospun MFe<sub>2</sub>O<sub>4</sub> (M=Co, Ni, Cu, Mn) spinel nanofibers with excellent electrocatalytic properties for oxygen evolution and hydrogen peroxide reduction, *Nanoscale*, 2015, **19**, 8920-8930
- [4] C. Goswami, Y. Yamada, E. V. Matus, I. Z. Ismagilov, M. Kerzhentsev, P. Bharali, Elucidating the Role of Oxide–Oxide/Carbon Interfaces of CuO<sub>x</sub>-CeO<sub>2</sub>/C in Boosting Electrocatalytic Performance, *Langmuir*, 2020, **36**, 15141-15152.
- [5] H. X. Zhang, Z. W. Zhang, N. Li, W. J. Yan, Z. P. Zhu, Cu<sub>2</sub>O@C core/shell nanoparticle as an electrocatalyst for oxygen evolution reaction, *J. Catal.*, 2017, **3**, 239-245.
- [6] C. C. Hou, W. Fu, Self-Supported Cu-Based Nanowire Arrays as Noble-Metal-Free Electrocatalysts for Oxygen Evolution, *ChemSusChem*, 2016, **9**, 2069-2073.
- [7] A. Dey, G. Chandrabose, L. A. O. Dampthey, E. S. Erakulan, R. Thapa, S. Zhuk, G. K. Dalapati, S. Ramakrishna, N. S. J. Braithwaite, A. Shirzadi, S. Krishnamurthy, Cu<sub>2</sub>O/CuO heterojunction catalysts through atmospheric pressure plasma induced defect passivation, *Appl. Surf. Sci.*, 2021, **541**, 148571.
- [8] D. Xing, P. Zhou, Y. Liu, Z. Wang, Z. Zheng, Y. Dai, M. H. Whangbo, B. Huang, Atomically Dispersed Cobalt-based Species Anchored on Polythiophene as an Efficient Electrocatalyst for Oxygen Evolution Reaction, *Appl. Surf. Sci.*, 2021, **545**, 148943.
- [9] P. Chen, K. Xu, T. Zhou, Y. Tong, J. Wu, H. Cheng, X. Lu, H. Ding, C. Wu, Y. Xie, Strong-Coupled Cobalt Borate Nanosheets/Graphene Hybrid as

Electrocatalyst for Water Oxidation Under Both Alkaline and Neutral Conditions, *Angew. Chem. Int. Ed.*, 2016, **55**, 2488-2492.
